# Supplementary material
Source: Research Square preprint supplement (doi:10.21203/rs.3.rs-8854013/v1)
Supplement: Supplementary file 1 [file 22d6d77dfc903db86f2b4eec.docx]

Appendix 1: Sample Interview Guide Questions

| **Mothers** |
| --- |
| 1. Please describe your experience and feelings about feeding your baby from birth until now. 2. What are the views of your spouse and family members regarding the feeding of your baby? 3. Please state the opinions of pediatric specialists, health staff, and lactation consultants regarding the feeding of your baby. 4. How do you realize that your milk is sufficient for your baby? 5. Please explain if you needed practical help during breastfeeding. How did the hospital nurses, health staff, and lactation consultants assist your breastfeeding? 6. Can you explain what an ideal situation for breastfeeding education or support in the Neonatal Intensive Care Unit (NICU) would look like for you? Please explain your expectations regarding the type of support they should provide. 7. In your opinion, what factors can help mothers of preterm infants succeed in breastfeeding? Please explain further with examples. 8. Please name the individuals who had the most influence on your breastfeeding success or failure and explain the nature of their influence or support. 9. Please state your opinion regarding the views, beliefs, and common religious and societal attitudes within the community and families that might act as barriers or aids to breastfeeding for mothers of preterm infants. 10. Where would you prefer to receive more information regarding breastfeeding and the care of your baby?  - As a supplementary note for each question 1 to 9: Could you elaborate on your meaning with more words? - Do you have any thoughts or questions about the topics we have recently discussed? |
| **Healthcare professionals and staff** |
| Based on your professional experience, please answer the following questions regarding the feeding status of preterm infants and supportive strategies:   1. Individual Factors Affecting Breastfeeding Continuity: Please describe your perspective on the individual factors that can contribute to the successful continuation of breastfeeding for preterm infants. 2. Role of Family and Relatives: What role do family and the surrounding support network play in the sustainability of mother’s milk feeding for preterm infants? 3. Role of Pediatric Specialists: Please state your opinion regarding the pivotal role of pediatric specialists in supporting the breastfeeding process for mothers of preterm infants. 4. Strategies for Capability Promotion: What practical strategies do you suggest for promoting the capability and self-efficacy of mothers in the area of breastfeeding? 5. Skills of Healthcare Personnel: Please express your view on the essential capabilities and skills of nurses and health workers in providing effective support for the breastfeeding of mothers with preterm infants. 6. Policies and Guidelines: Please offer your opinion regarding the official policies, laws, and guidelines that can act as facilitators or barriers in the path of breastfeeding preterm infants. |

Appendix2: Cross-tabulation of the relationships and expectations, and cultural enablers based on the PEN-3 model

|  | Cultural enablers (cultural appropriateness) | | | | |
| --- | --- | --- | --- | --- | --- |
| Themes | **category** | **Sub-category** | **positive** | **exotic** | **negative** |
|  | Some examples of open source code | | |
| Relationships and expectations  (educational diagnosis) | **Perceptions** | Acquiring breastfeeding knowledge ensures the long-term health of mother and baby. | Mothers' knowledge about optimal breastfeeding principles, benefits of breastfeeding, exclusive breastfeeding, the effect of breastfeeding on recovery and reducing the length of treatment and hospitalization, child development stages, age-appropriate nutrition, breastfeeding on demand | Awareness of the existence of childbirth preparation classes and Human Milk Bank | “Infant crying is a sign of insufficient milk, unawareness of the side effects of formula, and the use of pacifiers and bottles.” |
| Mother's ability to dynamically align lifestyle with infant nutritional challenges | Ability to hold and breastfeed the infant, ability to make decisions about infant care and feeding, ability to wake the infant, ability to get help from family members, ability to prevent breast problems | Seeing other mothers' experiences, being able to manage breastfeeding outside the home | Feeling unable to produce milk, unable to care for the infant |
| Fundamental health-oriented cultural beliefs | Belief in the benefits of breast milk as the best nutrition for breastfeeding, biological superiority, immunogenic role, belief in the true sense of motherhood with breastfeeding, breastfeeding as a factor in defining oneself as a capable mother, breastfeeding as the main channel for expressing love and closeness with the child. | Mothers' use of cultural and religious artifacts such as prayer, holy water, and traditional baths on the tenth day of childbirth, rubbing some herbal medicines to strengthen the back and head of the postpartum woman, the effect of prayer on reducing stress, the effect of religious beliefs on the physical and mental development of the fetus, religious beliefs, patience, and hope, performing ablution and facing the Qiblah, breastfeeding for spiritual rewardding | Understanding the breast as a storehouse, breast size as a measure of milk production, ear piercing or lifting the palate to resolve infant refusal, referral to a specialist for refusal problems, belief that premature infants are defective, milk spoilage in the mother's breast, the pacifier as the child's second mother, fear of insufficient breast milk volume, doubt in the nutritional effectiveness of breast milk |
| Cultivating religious beliefs and teachings | Positive beliefs and religious beliefs of the family about the importance of breastfeeding |  | Belief in divine providence and failure to consult a counselor to resolve breastfeeding problems, conflict of beliefs, and humane pasteurization of milk |
| **nurtureres** | Reliable sources of information search | Credible scientific sources, virtual channels, lactation consultants and health professionals. The most credible scientific sources, spouses with health-related jobs, friends as role models for mothers regarding infant feeding, forming virtual groups with the same name, introducing credible virtual channels, influential role models, introducing credible educational media. | Several online channels feature consultants who share the experiences of successful mothers | online channels and peers without scientific support, reciving information from unreliable sites |
| Support structure network  (family, personnel). | Family involvement in newborn care, effective professional support, receiving accurate, empathetic, and practical guidance from the neonatal care team, verbal encouragement from staff and specialists, providing emotional comfort for the mother, strengthening her resilience to endure difficulties, helping to reduce maternal stress, increased attention from mothers of premature infants, and deep satisfaction derived from providing the best possible nutrition for the baby despite challenging circumstances. | Reading to premature infants helps stimulate the development of brain neurons  Ensuring adequate nutrition for the mother | Staff ignoring the mother’s feelings and situation, saying negative and discouraging things about the baby.  Others not fully grasping how crucial and challenging it is to breastfeed a premature baby, and comparing the mother unfavorably to others. |
| **enablers** | Financial and time investment | The value of time allocated to breastfeeding, allocating time to expressing milk, referring to a lactation consultant, providing equipment including breast pumps in the NICU. | Recording and describing the exact times for pumping or visiting the baby according to hospital guidelines (without reference to how difficult or easy it is). Obeying or not following strict NICU guidelines . | Lack of time management for daily life tasks and breastfeeding |
| Developing training programs  to empower staff and mothers | The presence of trained consultants in the hospital and lactation counseling clinics, holding annual skill-building workshops for health and medical staff, launching childbirth preparation classes, and the presence of a breast milk bank in a baby-friendly hospital. | Presence of psychologist and speech therapist in the hospital, educational programs related to mental health during pregnancy in comprehensive health service centers, private delivery room, presence of a resident physician, implementation of skin-to-skin contact and the first hour of breastfeeding | Lack of breastfeeding assessment before discharge, lack of scientific evaluation of educational workshops held, low quality of prenatal education in comprehensive health service centers, lack of appropriate educational media for mothers |
